# 1 The planning horizon for movement sequences

2 Running title: Sequence planning horizon

3 Giacomo Ariani<sup>1,2,§,\*</sup>, Neda Kordjazi<sup>1,§</sup>, J. Andrew Pruszynski<sup>1,4,5,6</sup>, Jörn Diedrichsen<sup>1,2,3</sup>

4

5

6 <sup>1</sup>The Brain and Mind Institute, <sup>2</sup>Department of Computer Science, <sup>3</sup>Department of Statistical and  
7 Actuarial Sciences, <sup>4</sup>Department of Physiology and Pharmacology, <sup>5</sup>Department of Psychology, <sup>6</sup>Robarts  
8 Research Institute, Western University, London, Ontario N6A 3K7, Canada.

9

10 <sup>§</sup>Denotes equal contribution.

11

12 \*Correspondence. Address correspondence to Giacomo Ariani at [gariani@uwo.ca](mailto:gariani@uwo.ca), The Brain and Mind  
13 Institute, Western University, Western Interdisciplinary Research Building, London, ON N6A 3K7,  
14 Canada.

15

16 **Word count.** Abstract: 219; Introduction: 606; Discussion: 1465. 27 pages, 7 figures, 0 tables.

17

18 **Author contributions.** N.K. and J.D. designed research; N.K. performed research; G.A. and N.K. analyzed  
19 data; G.A. drafted the manuscript; G.A., J.A.P., and J.D. edited the manuscript.

20

21 **Acknowledgements.** This work was supported by a James S. McDonnell Foundation Scholar award and  
22 a NSERC Discovery Grant (RGPIN-2016-04890) to JD, and the Canada First Research Excellence Fund  
23 (BrainsCAN). J.A.P is funded by the Canada Research Chairs program. The authors thank Eva Berlot for  
24 comments on earlier versions of the manuscript.

25

26 **Disclosures.** The authors declare no conflicts of interest.

27

## 28 **Abstract**

29 When performing a long chain of actions in rapid sequence, future movements need to be planned  
30 concurrently with ongoing action. However, how far ahead we plan, and whether this ability improves  
31 with practice, is currently unknown. Here we designed an experiment in which healthy volunteers  
32 produced sequences of 14 finger presses quickly and accurately on a keyboard in response to numerical  
33 stimuli. On every trial, participants were only shown a fixed number of stimuli ahead of the current  
34 keypress. The size of this viewing window varied between 1 (next digit revealed with the pressing of  
35 the current key) and 14 (full view of the sequence). Participants practiced the task for five days and  
36 their performance was continuously assessed on random sequences. Our results indicate that  
37 participants used the available visual information to plan multiple actions into the future, but that the  
38 planning horizon was limited: receiving information about more than 3 movements ahead did not result  
39 in faster sequence production. Over the course of practice, we found larger performance  
40 improvements for larger viewing windows and an expansion of the planning horizon. These findings  
41 suggest that the ability to plan future responses during ongoing movement constitutes an important  
42 aspect of skillful movement. Based on the results, we propose a framework to investigate the neuronal  
43 processes underlying simultaneous planning and execution.

44

## 45 **Key words**

46 Motor planning; Sequence production; Practice effects; Hand function; Skillful movement.

## 47 **Significance Statement**

48 Although skill learning has typically focused on the training of specific movement sequences, practice  
49 improves performance even for random sequences. Here we hypothesize that a fundamental aspect of  
50 skilled sequential behavior is the ability to plan multiple actions into the future, both before and during  
51 execution. By controlling the amount of visual information available for motor planning, we show that  
52 people plan at least three movements beyond current action and that this planning horizon expands  
53 with practice. Our results suggest that coordinating ongoing movement and planning of future actions  
54 is central to a wide range of cognitive and motor tasks, providing a new perspective on the neural  
55 implementation of motor planning in the context of sequential behavior.

56

## 57 Introduction

58 Humans exhibit a wide range of behaviors, from whole-body activities like running or riding a bike, to  
59 fine dexterous skills like writing or typing on a keyboard. Many of such skills share one common feature:  
60 they are comprised of a series of separate motor elements that are strung together in quick succession  
61 to form longer and more complex sequences of movements (Lashley, 1951). When learning a new  
62 sequential skill, people usually need many hours of practice to achieve fluidity in performance (Ericsson  
63 et al., 1993). With practice, sequence production becomes quicker, more accurate, and less effortful  
64 (Verwey, 1994; Rhodes et al., 2004; Diedrichsen and Kornysheva, 2015; Krakauer et al., 2019), leading  
65 in the long run to the skillful behaviors typically observed in elite athletes (Yarrow et al., 2009).

66 Previous studies of motor sequence learning have largely focused on the training of specific  
67 movement sequences (Cohen et al., 1990; Willingham, 1999; Verwey, 2001; Verwey and Abrahamse,  
68 2012; Kornysheva et al., 2013, 2019; Verwey et al., 2014; Wong et al., 2015b; Mantziara et al., 2020).  
69 However, many sequences we execute in everyday life are not fully predictable and practice improves  
70 performance even for random or untrained sequential movements (Waters-Metenier et al., 2014;  
71 Wiestler et al., 2014; Ariani et al., 2020). Some of these sequence-general improvements arise because  
72 participants learn to translate individual visual stimuli into motor responses and to execute these  
73 responses more quickly (Ariani and Diedrichsen, 2019; Hardwick et al., 2019). Such improvements in  
74 single responses benefit the production of all sequences, including random ones.

75 In the present study, we focus on a second core ability that benefits the production of  
76 unpredictable sequences: the ability to plan future movements ahead of time. Planning of movements  
77 before their initiation, here referred to as *preplanning*, has been studied extensively (Rosenbaum, 1980;  
78 Rosenbaum et al., 1987, 2007; Churchland et al., 2010; Cisek and Kalaska, 2010; Kaufman et al., 2014;  
79 Wong et al., 2015a; Haith et al., 2016). However, long or complex movement sequences are unlikely to  
80 be fully preplanned, so planning of the remaining elements must continue throughout sequence  
81 production – a process that we have recently named *online planning* (Ariani and Diedrichsen, 2019).  
82 Take the example of a basketball player dribbling up the court. The player needs to control a continuous  
83 flow of movements (e.g., to keep the dribble alive) while scouting the court and planning future  
84 movements depending on the actions of both teammates and opposing defenders. Some evidence for  
85 online planning has been observed for a range of behaviors, such as reading (Rayner, 1998, 2014;  
86 Rayner and Reingold, 2015), walking (Matthis and Fajen, 2014), sequential reaching (Säfström et al.,  
87 2013, 2014) and path tracking (Bashford et al., 2018). However, to what extent the motor system plans  
88 upcoming movements during sequence production (i.e., the horizon of online planning) remains poorly  
89 understood.

90           Here we asked 1) how far the benefit of planning ahead extends beyond current execution, and  
91   2) whether this planning horizon can be improved with practice. To answer these questions, we used a  
92   discrete sequence production (DSP) task, in which participants performed random sequences of 14  
93   keypresses with their right hand in response to numerical cues. We manipulated how many digits  
94   participants could see ahead of the current keypress. Viewing window size ranged from 1 (only the next  
95   movement is cued, as in the serial reaction time task, SRTT) to 14 (the entire sequence shown at once,  
96   as in the DSP task). Participants practiced producing varying sequences over 5 days. This design allowed  
97   us to examine the horizon of both pre- and online planning in sequence production, as well as the  
98   influence of practice on the planning horizon.  
99

## 100 **Methods**

### 101 *Participants*

102 Seventeen right-handed neurologically healthy volunteers (8 women, 9 men; age 18–36 years, mean  
103 25.81 years, SD 5.09 years) were recruited for this study. Handedness was assessed with the Edinburgh  
104 Handedness Inventory (mean 82.81, SD 18.07). Individuals participated in 5 sessions of practice (2 hours  
105 each, on 5 separate days). All participants provided written informed consent and were naive to the  
106 purposes of the study. Two participants abandoned the study after the first session of practice. One  
107 participant had an unusually high error rate (> 30%, while every other participant managed to keep the  
108 error rate < 20%, as per instructions). These 3 participants were excluded from successive analyses  
109 (final N = 14). For one of the remaining 14 participants, age and handedness data was missing. All  
110 experimental methods were approved by the Research Ethics Board at Western University.

111

### 112 *Apparatus*

113 Participants placed their right hand on a custom-made keyboard (Fig. 1A), with a force transducer  
114 (Honeywell FS series) mounted underneath each key. The keys were immobile and measured isometric  
115 finger force production. The dynamic range of the force transducers was 0-16 N and the resolution 0.02  
116 N. A finger press/release was detected when the force crossed a threshold of 1 N. The forces measured  
117 from the keyboard were low pass filtered, amplified, and sent to PC for online task control and data  
118 recording. Numerical stimuli were shown in white against a black background, horizontally aligned in a  
119 single line, and spanned ~36° of visual angle for an entire sequence.

120

### 121 *Procedure*

122 In each of the five practice sessions, participants sat in front of a computer screen with their right hand  
123 on the keyboard. The task required participants to produce sequences of keypresses in response to  
124 numerical cues appearing on the screen (numbers 1 to 5, corresponding to fingers of their right hand,  
125 thumb to little finger, respectively) as quickly and accurately as possible (Fig. 1A). On every trial, only a  
126 fixed number of digits ahead of the current press position (viewing window size,  $w$ ) were revealed to  
127 the participants, while the rest were masked with asterisks (Fig. 1B). The masked digits were revealed  
128 to the participant as they proceeded, from left to right, with the presses in each sequence. The window  
129 size varied within the domain of  $w = \{1, 2, 3, 4, 5, 6, 7, 8, 14\}$ , and was randomized across trials within  
130 every block. As an attentional pre-cue, during the inter-trial interval (ITI, 1.5 seconds) participants were  
131 presented with a fixation cross on the location of the first digit in the sequence. With every press,  
132 subjects received feedback about the correctness of their action: the white numbers turned either

133 green or red and were accompanied by a corresponding sound for correct and incorrect presses,  
 134 respectively.  
 135  
 136

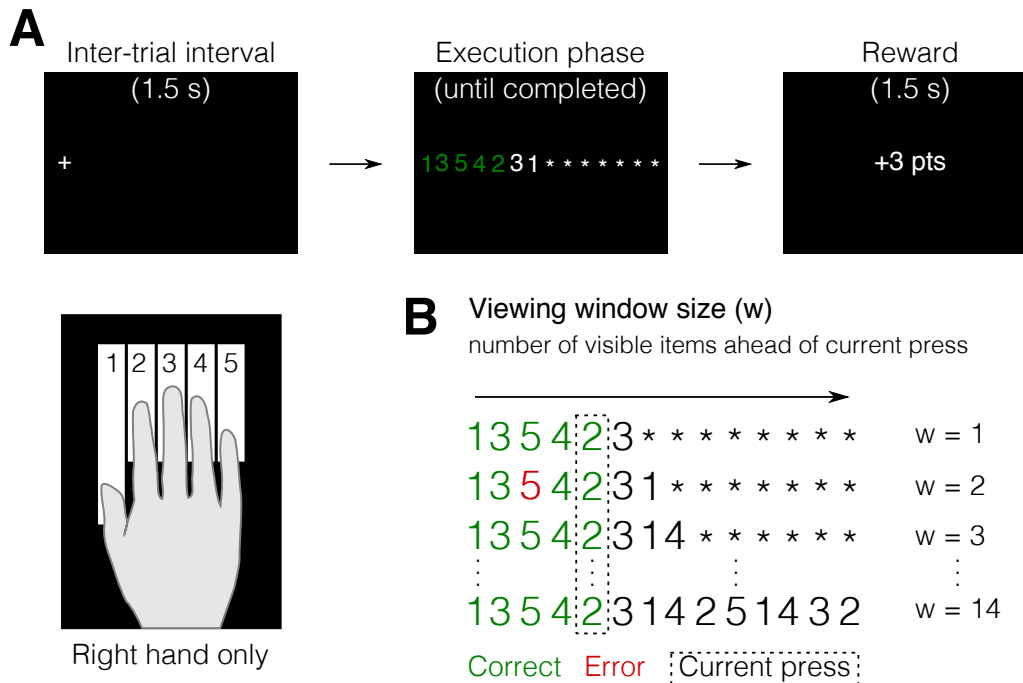

137  
 138 **Figure 1 | Varying viewing window in a discrete sequence production (DSP) task.** **A.** Example  
 139 trial in a DSP task with viewing 2 items ahead of the current keypress, while the remaining  
 140 items are masked by asterisks. **B.** Viewing window size ( $w$ ) manipulation, from  $w = 1$   
 141 (equivalent to a simple reaction time task), to  $w = 14$  (display of the entire sequence at once).  
 142 The arrow indicates the from-left-to-right direction of response order. Participants could start  
 143 each sequence whenever they felt ready and were rewarded on the basis of their movement  
 144 time (MT, the time from the first keypress to the release of the last key in the sequence).  
 145

146  
 147 To motivate participants to improve in the task, they were rewarded with points based on their  
 148 performance after each trial. Points were awarded on the basis of sequence movement time (MT) and  
 149 execution accuracy. MT corresponded to the time interval between making the first press in the  
 150 sequence to releasing the last press in the sequence. Accuracy was calculated as  $1 - \text{error rate}$   
 151 (proportion of error trials in a block) in percentage. Specifically, a trial was considered an error if it  
 152 contained one or more incorrect presses, for which participants received 0 points. Correct sequences  
 153 were rewarded with at least 1 point. Finally, participants were awarded 3 points if 1) a sequence was  
 154 correct and 2) MT 5% or more faster than a specific time threshold. This time threshold was designed  
 155 to get increasingly difficult adjusting to every subject's speed throughout training. It would decrease by  
 156 5% from one block to the next if two performance criteria were met: median MT in the current block

157 faster than best median MT recorded hitherto, and mean error rate in the last block  $\leq 15\%$ . If either  
158 one of these criteria was not met, the thresholds remained unchanged. At the end of each block,  
159 participants received feedback on their error rate, median sequence MT, total points obtained during  
160 the block, and total points obtained during the session. Subjects were asked to try to maintain an error  
161 rate below 15%.

162 In the original design, we intended to compare also how the ability to plan ahead might affect  
163 partially familiar (structured) sequences. Therefore, each one of the 5 practice sessions consisted of 8  
164 blocks (27 trials each) of 14-item sequences and 3 blocks (60 trials each) of specific short 3-/4-item  
165 segments that composed the structured sequences. One-third of the trials in the sequence blocks were  
166 randomly generated by random shuffles of the digits 1 to 5. The remaining two-thirds of the trials were  
167 structured sequences. As the results from the structured sequences turned out to be hard to interpret,  
168 the present paper focuses only on the completely unfamiliar, random sequences.

169

#### 170 *Data analysis*

171 Data were analyzed with custom code written in Matlab (The MathWorks, Inc., Natick, MA). To evaluate  
172 the speed of sequence production, we inspected the time intervals between different keypresses.  
173 Reaction times (RT) were defined as the time from stimulus onset to first press (i.e., the first crossing  
174 of the 1 N force threshold). Note that participants were not instructed to react particularly fast. Instead,  
175 they could take as much time as they wanted until they felt ready to start. MTs were defined as the  
176 time between the first press and the release of the last press in the sequence (i.e., the time between  
177 the first and the last crossing of the force threshold). Finally, we calculated inter-press intervals (IPI)  
178 between subsequent pairs of presses in the sequence (i.e., the time interval between every two  
179 consecutive crossings of the force threshold). Unless otherwise noted, we used within-subject repeated  
180 measures ANOVAs and 2-sided paired samples *t*-tests for statistical inference in assessing the effects  
181 of viewing window or practice on RT, MT, and IPI. Error trials were excluded from data analysis. To  
182 provide meaningful error bars for within-subject comparison, the standard error for each condition was  
183 calculated on the residuals after subtracting the mean across conditions for each participant. This way,  
184 the error bars visualized the size of the relevant error term in a repeated-measures ANOVA.

185 To describe the relationship between MT and the viewing window size, we used the following  
186 exponential model:

187

$$188 \quad MT' = a * \exp(-b * (w - 1)) + c,$$

189



190 where  $MT'$  is the predicted MT for a given viewing window size  $w$ . Note that for  $w = 1$ , the function  
191 reduces to the initial value of the exponential,  $MT' = a + c$ . The asymptote is given by  $c$  and the slope  
192 by  $b$ . This model was then fit to the MT data of each participant using Matlab's `nlinfit()` function,  
193 which implements the Levenberg-Marquardt nonlinear least-squares algorithm. We determined the  
194 effective planning horizon ( $w^*$ ), by finding the window size for which the predicted MT of the  
195 participant had dropped 99% of the difference between  $w = 1$  and the asymptote, i.e., by solving the  
196 equation for  $w$ :

197

198

$$w^* = -\log(0.01)/b + 1,$$

199

200 where the 0.01 arises from the criterion of the 99% drop (i.e., 1% above the  $MT'$  asymptote). The  
201 improvement in effective planning horizon with practice was then assessed by fitting the model to the  
202 data of each participant on each day and comparing  $w^*$  between day 1 and day 5 with a within-subject  
203 2-sided paired samples  $t$ -test. While the use of a 99% criterion is arbitrary, changes in this criterion only  
204 scale the effect planning horizon by a specific value but do not change the outcome of the statistical  
205 analysis.

206

## 207 Results

### 208 *Preplanning of future movements speeds up sequence production*

209 First, we assessed the benefit of being able to plan future finger movements on sequence production.  
210 To determine this, we varied the amount of available information and tested how this window size  
211 affected the speed of performance. On average, across all days of practice, larger window sizes  
212 produced shorter MTs (Fig. 2A), as confirmed by the highly significant main effect of window size on  
213 MT in a repeated measures ANOVA ( $F_{8,104} = 176.980$ ,  $p < 10e-10$ ). This finding suggests that the  
214 availability of visual information allows for preplanning of sequential actions into the future, which in  
215 turn reduces MT. Interestingly, this benefit appeared to plateau around a window size of 3 or 4. Indeed,  
216 when we compared the MT of each viewing window to the average MT for larger window sizes, we  
217 found a significant difference for  $w = 3$  vs.  $w > 3$  ( $t_{13} = 4.644$ ,  $p = 4.591e-04$ ), but not for  $w = 4$  vs.  $w > 4$   
218 ( $t_{13} = 2.083$ ,  $p = 0.058$ ). To obtain an individual measure of the planning horizon, we fit an exponential  
219 model to the MT curve of each participant (Fig. 2B, see Methods).

220  
221

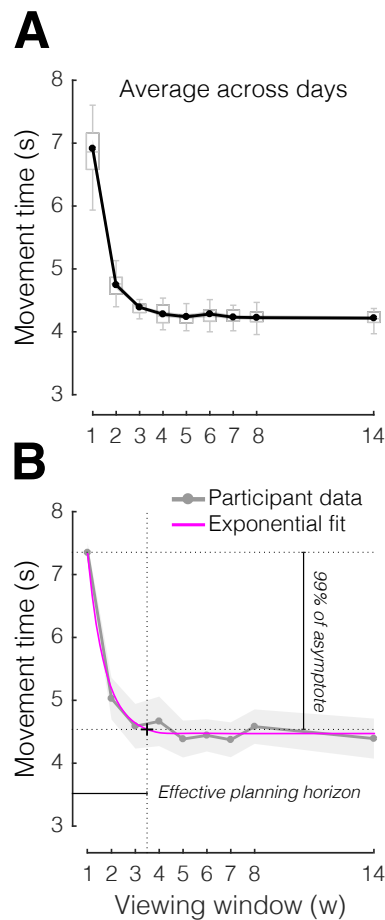

222

223

224

**Figure 2 | The benefit of planning ahead on sequential performance. A.**  
Average movement time as a function of viewing window, across the 5 days of

225 *practice. B. Method used to estimate the effective planning horizon. Example*  
226 *data from one participant (gray) is fit to an exponential model (magenta). The*  
227 *intersection between performance at 99% of asymptote and the exponential fit*  
228 *was chosen as criterion to determine the effective planning horizon. Box plots*  
229 *show the median and whole range of individual data points (one per*  
230 *participant). Shaded areas reflect standard error of the mean.*  
231

232

233 Next, we decided on an arbitrary criterion on the exponential (99% of the MT drop to the asymptote)  
234 to establish the individual effective horizon of each participant. This analysis revealed a mean effective  
235 planning horizon of  $3.58 \pm 0.28$  items ahead of the current item, indicating that, on average,  
236 participants were able to plan at least 3 keypresses into the future.

237

### 238 ***Practice expands the planning horizon***

239 We then asked whether practicing sequences would affect the ability to plan future movements by  
240 comparing performance at the beginning (day 1) and at the end (day 5) of practice (Fig. 3A). We  
241 observed that MT improved across all window sizes (main effect of day:  $F_{1,13} = 18.004$ ,  $p = 0.001$ ).  
242 Significant improvements were found even for a window size of 1 (MT difference day 1 vs. day 5:  $586$   
243  $\pm 262$  ms;  $t_{13} = 2.234$ ,  $p = 0.022$ ). This condition was, in essence, a serial reaction time task, where each  
244 cue was only presented after the preceding key was pressed, meaning that participants were forced to  
245 serially cycle through the planning and execution of every press, with no possibility for planning ahead.  
246 Therefore, MT improvements for a window size of 1 must be a consequence of 1) better stimulus  
247 identification, 2) better stimulus-response (S-R) mapping, or 3) better execution (i.e., motor  
248 implementation) of single responses.

249 If learning was restricted to improvement in any of these three processes, we would predict  
250 equal MT improvement across all window sizes, given that stimulus identification, S-R mapping, and  
251 execution are necessary steps across all viewing windows. Contrary to prediction, we found a significant  
252 interaction between window size and stage of practice (day 1 vs. day 5;  $F_{8,104} = 3.220$ ,  $p = 0.003$ ).  
253 Furthermore, when we directly inspected the MT improvement (percentage change relative to average  
254 MT for each horizon, Fig. 3B), we found significantly larger gains for larger viewing windows ( $w = 2$  vs.  
255  $w = 1$ :  $t_{13} = 3.338$ ,  $p = 0.005$ ;  $w = 3$  vs.  $w = 2$ :  $t_{13} = 2.722$ ,  $p = 0.017$ ), until again the gains plateau for  $w$   
256  $= 4$  or larger ( $w = 4$  vs.  $w = 3$ :  $t_{13} = 0.113$ ,  $p = 0.912$ ). Thus, although responses to single items improved  
257 with practice, this improvement cannot explain why performance benefits were more pronounced for  
258 larger window sizes. Instead, the additional performance benefit must arise because participants  
259 became more efficient at using the advance information provided by larger viewing windows.

260 In addition to the evidence for more efficient planning of future elements, we also found  
261 evidence that participants planned further into the future. When we determined the effective planning

262 horizon for each participant and day (Fig. 2B) using an exponential fit (see Methods), we found that the  
263 planning horizon expanded from 3.20 to 3.88 digits ahead of current action between day 1 and day 5  
264 (paired-samples  $t$ -test,  $t_{13} = 2.840$ ,  $p = 0.014$ , Fig. 3C). Thus, participants not only became more efficient  
265 in planning but planned sequential actions further into the future.  
266  
267

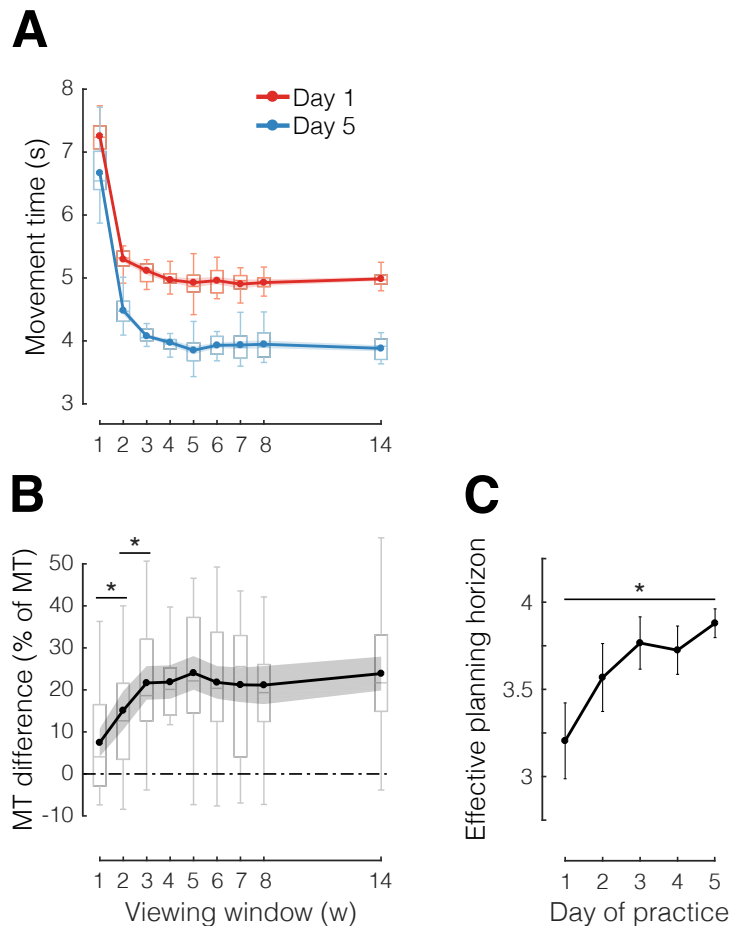

268

269 **Figure 3 | The effective planning horizon increases with practice.** **A.** Average  
270 movement time (MT) as a function of viewing window ( $w$ ), separately for early  
271 (day 1, red) and late (day 5, blue) stages of sequence practice. **B.** Difference in  
272 performance (sequence MT) between early and late practice (data in A),  
273 normalized by average MT, as a function of  $w$ . **C.** Mean effective planning  
274 horizon (estimated as shown in Fig. 2B) for each day of practice. Box plots show  
275 the median and whole range of individual data points (one per participant).  
276 Shaded areas (or error bars) reflect standard error of the mean. \* $p < 0.05$ , two-  
277 tailed paired-samples  $t$ -tests.  
278

279

280 Note that faster MTs for larger window sizes did not occur at the expense of reduced accuracy in  
281 performance. On average, the percent accuracy of presses remained roughly constant around 85-90%  
282 across all viewing window conditions. We found no significant main effect of window size ( $F_{8,104} = 1.182$ ,

283  $p = 0.317$ ), practice stage ( $F_{1,13} = 0.325$ ,  $p = 0.578$ ), or interaction between the two factors ( $F_{8,104} = 0.548$ ,  
284  $p = 0.818$ ).

285 Taken together, these results show that participants became faster in sequence production by  
286 getting better at 1) making single responses (involving stimulus identification, S-R mapping, or  
287 execution) and 2) exploiting available information to plan more upcoming movements in advance.

288

### 289 *Reaction times increase with the amount of preplanning*

290 If participants invested time in preplanning the first few elements of each sequence, then we would  
291 expect this to be reflected in their reaction times: namely, participants should start a sequence earlier  
292 when presented with a smaller window size, and later for larger window sizes, since they would be  
293 preparing more of the upcoming keypresses. Even though fast RTs were not required by the task,  
294 participants likely tried to balance the benefit of getting more points with the benefit of finishing the  
295 experiment more quickly. On average across all days (Fig. 4A), larger viewing windows resulted in slower  
296 RTs. A repeated-measures ANOVA substantiated this effect ( $F_{8,104} = 4.563$ ,  $p = 8.726e-05$ ).

297

298

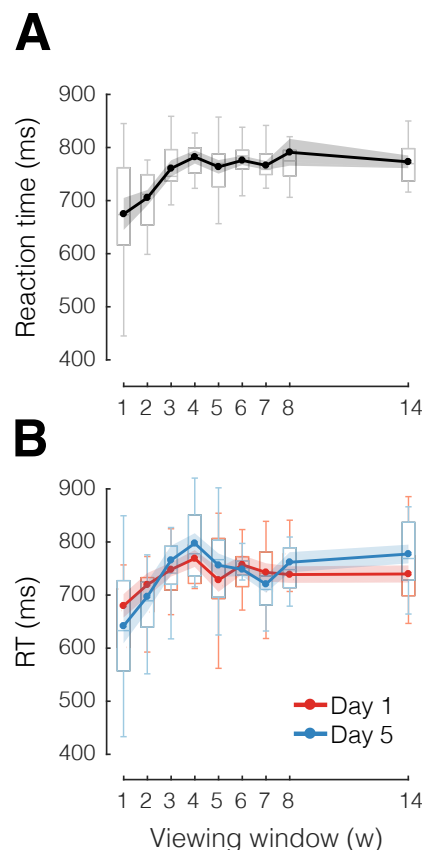

299

300 *Figure 4 | Longer reaction times for larger viewing windows. A. Average*  
301 *reaction time as a function of viewing window. B. Subset of data in A,*  
302 *separating between early (day 1, red) and late (day 5, blue) stages of practice.*  
303 *Box plots show the median and whole range of individual data points (one per*  
304 *participant). Shaded areas reflect standard error of the mean.*  
305

306

307 However, as observed for MTs, RTs appeared to plateau for window sizes larger than 3. Thus, even  
308 though participants could see more than 3 elements on the screen and had virtually unlimited time to  
309 preplan, they initiated the sequence in approximately 700-800 ms from cue onset.

310 Did this dependence of RTs on the amount of available information change with practice?  
311 When we compared RTs across early and late stages of practice (Fig. 4B) we found no indication that,  
312 late in practice, participants waited longer to initiate a sequence ( $F_{1,13} = 0.012$ ,  $p = 0.913$ ), or that their  
313 strategy changed over time (no interaction between practice stage and window size:  $F_{8,104} = 1.187$ ,  $p =$   
314  $0.314$ ). Thus, even though over time participants did not spend more time preplanning, the MT results  
315 indicate that motor planning improved, as participants could make use of more visual information in  
316 roughly the same amount of preparation time (i.e., with comparable RTs).

317

### 318 *Planning ahead continues during sequence production*

319 So far, our results have indicated that participants improve their ability to perform random sequences  
320 of finger movements by becoming more efficient in using the information provided by larger window  
321 sizes. However, it remains unclear whether participants got better at planning movements before  
322 sequence production (preplanning), during sequence production (online planning), or both. To  
323 distinguish the contributions of preplanning and online planning to performance improvements, we  
324 examined the intervals between individual presses in a sequence (i.e., the IPIs). The rationale behind  
325 this analysis is that short IPIs reflect an increased readiness to press (i.e., better planning) than long  
326 IPIs. If all keypresses were equally well prepared (e.g., as in the case of  $w = 1$ , which does not allow  
327 participants to plan ahead), then all IPIs within a sequence should roughly have the same duration  
328 depending on the serial RT (null hypothesis, Fig. 5A). Alternatively, if only early presses in a sequence  
329 can be fully preplanned, while later presses can only be minimally planned, or are completely  
330 unplanned, then early IPIs should be significantly shorter than later IPIs, which will revert to serial RT  
331 speed (Fig. 5B). Finally, if online planning continues in parallel with execution, we should expect an  
332 effect of window size also on mid to late IPIs (Fig. 5C).

333 In light of these predictions, we first inspected the IPIs averaging across practice stages (Fig.  
334 5D). For a window size of 1, all IPIs had approximately the same duration (~500 ms), reinforcing the  
335 idea that for  $W = 1$ , each keypress is selected, planned, and executed independently. In contrast, for

336 window sizes larger than 1, we found a clear effect of IPI placement (i.e., finger transition number within  
 337 the sequence) on IPI duration ( $F_{12,156} = 33.111, p < 10e-10$ ). Specifically, the first and last IPIs were  
 338 consistently performed much faster than the middle IPIs, regardless of the size of the viewing window  
 339 ( $W > 1$ ). For  $W = 2$ , the first IPI (first 2 finger presses) was faster than subsequent IPIs; for  $W = 3$ , the  
 340 first two IPIs (first 3 finger presses) were faster than subsequent IPIs. For  $W > 3$ , this preplanning  
 341 advantage appeared to be spread over the first 3 finger transitions. This pattern of results indicates that  
 342 the initial speed up reflects the fact the visible digits can be preplanned during the reaction time, and  
 343 hence are executed faster.  
 344  
 345

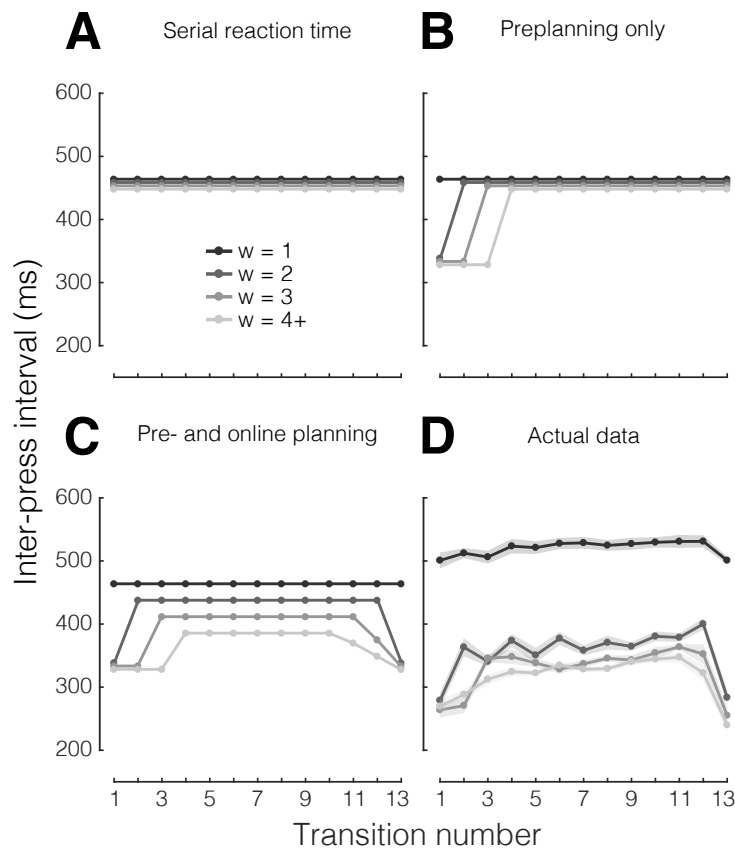

346  
 347 **Figure 5 | Predictions and analysis of inter-press intervals (IPIs).** Average inter-  
 348 press interval (IPI) as a function of transition number within each sequence,  
 349 separately for viewing window size ( $w$ , different shades of gray). 4+ indicates  
 350  $w \geq 4$ . **A.** Prediction 1 (null hypothesis): no effect of  $w$ , all IPIs roughly in the  
 351 same range. **B.** Prediction 2: Fast early IPIs reflect the benefit of preplanning,  
 352 but for unplanned keypresses the benefit of viewing ahead is minimal. **C.**  
 353 Prediction 3: even mid to late IPIs benefit from larger  $w$ , indicating that both  
 354 pre- and online planning are contributing to fast sequence production. **D.**  
 355 Actual group data of mean IPIs for each keypress transition, separately for each  
 356 viewing window.  
 357

358

359 Consistent with RT and MT data, preplanning does not seem to improve further beyond a window size  
360 of 3. This observation reinforces the idea that participants preplanned at least the first three  
361 movements of each finger sequence. Once all preplanned keypresses are executed, planning must  
362 continue online, slowing down later IPIs. Thus, the slower IPIs in the middle of the sequence mostly  
363 reflect limits in the speed of online planning. When we restricted our analysis to these middle IPIs  
364 (transitions 5 to 12), the differences between  $w = 1$  and  $w = 2$  ( $t_{13} = 19.557$ ,  $p = 5.037e-11$ ), between  $w$   
365  $= 2$  and  $w = 3$  ( $t_{13} = 5.013$ ,  $p = 2.374e-04$ ), and between  $w = 3$  and  $w = 4$  remained significant ( $t_{13} =$   
366  $2.182$ ,  $p = 0.048$ ). This indicates that, just like preplanning, online planning benefits from having visual  
367 information about up to 3 presses into the future, thus highlighting clear parallels between the two  
368 processes.

369 We also observed that, consistent across all window sizes greater than 1, the last IPI was  
370 executed much more quickly than preceding IPIs. Currently, we can only speculate about the reasons  
371 for this result. One idea is that participants tend to select and plan the last 2 presses as a unit. These  
372 presses can then be executed very quickly, as no more movements need to be planned after those two  
373 (which frees up planning capacity). Alternatively, participants could optimize the last two presses from  
374 an execution biomechanics perspective. Given that no subsequent movements are needed,  
375 participants do not have to maintain a specific hand posture that would be required for fast execution  
376 of successive movements. Instead, they are free to optimize their hand posture for comfort and speed  
377 only in regard to making the last two presses.

378

### 379 ***Both pre- and online planning improve with practice***

380 Finally, we asked whether practice effects on MT are more likely related to improvements in  
381 preplanning, online planning, or both. From day 1 to day 5 (Fig. 6A), we observed significant main  
382 effects of practice stage on IPI duration on both early (IPI 1-3:  $F_{1,13} = 17.623$ ,  $p = 0.001$ ) and middle IPIs  
383 (IPI 5-12:  $F_{1,13} = 15.988$ ,  $p = 0.002$ ). To quantify the relative contributions of preplanning and online  
384 planning, we carried a separate analysis (Fig. 6B) averaging across IPIs that were more likely preplanned  
385 (IPI 1 for  $w = 2$ , IPI 1-2 for  $w = 3$ , and IPI 1-3 for  $w \geq 4$ ), or not (the remaining IPIs for each viewing  
386 window condition, which had to be planned online). For  $w = 1$ , only the first press, but not the first IPI,  
387 can be preplanned. Therefore, we cannot attribute any of the observed improvements to either  
388 sequence preplanning or online planning. Instead, eventual improvements need to arise from improved  
389 visual identification, S-R mapping, or execution. We computed the IPI difference between day 1 and  
390 day 5 for these three categories, normalized it by the average IPI duration across days (separately for  
391 each category), and plotted it against viewing window size (Fig. 6B). This analysis confirmed that IPIs



392 got faster with practice even for  $w = 1$  (one-sample  $t$ -test vs zero difference:  $t_{13} = 2.305$ ,  $p = 0.038$ ).  
 393 Additionally, we found clear further improvements in IPI duration for  $w > 1$ : compared to  $w = 1$ , these  
 394 effects were present both for the IPIs that were likely preplanned ( $t_{13} = 4.028$ ,  $p = 0.001$ ), and for those  
 395 that relied on online planning ( $t_{13} = 6.009$ ,  $p = 4.379e-05$ ). There was no significant difference between  
 396 preplanning and online planning in terms of learning improvements ( $F_{1,13} = 1.141$ ,  $p = 0.305$ ), nor was  
 397 there an interaction between planning process and viewing window ( $F_{2,26} = 1.000$ ,  $p = 0.382$ ). Thus,  
 398 preplanning and online planning appear to have similar capacity limits and to benefit similarly from  
 399 practice in sequence production.  
 400  
 401

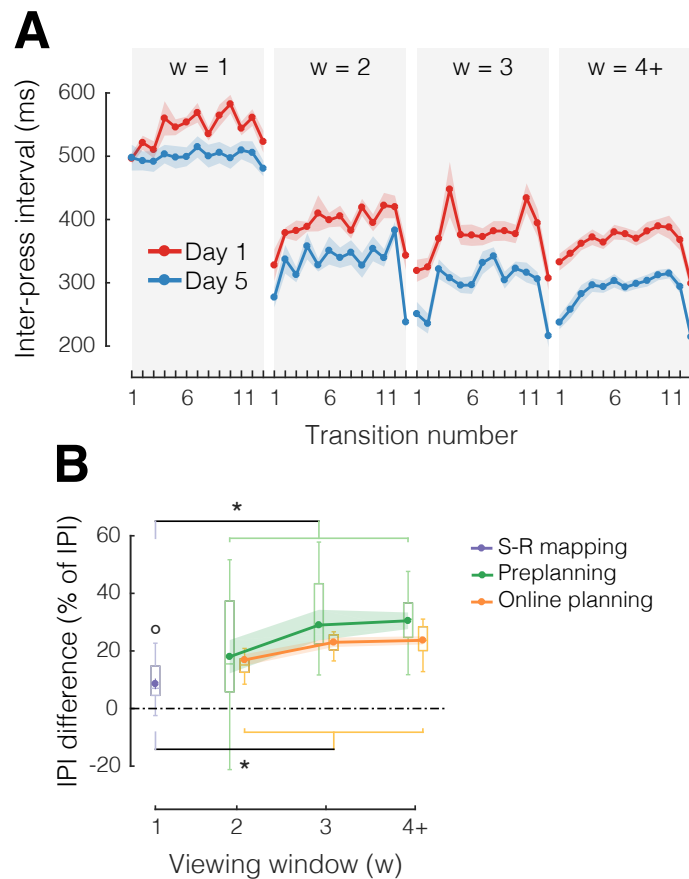

402  
 403 **Figure 6 | Improvements in pre- and online planning with practice. A.** Mean IPI  
 404 as a function of transition number, separately for practice stage (day 1, red;  
 405 day 5, blue) and viewing window size ( $w = 1, 2, 3, 4+$  in separate plots). **B.**  
 406 Average IPI difference between day 1 and day 5, normalized by average IPI for  
 407 each day, separately for each  $w$  and planning process (S-R mapping, purple;  
 408 Preplanning, green; Online planning, orange). Box plots show the median and  
 409 whole range of individual data points (one per participant). Shaded areas  
 410 reflect standard error of the mean. \* $p < 0.05$ , two-tailed paired-samples  $t$ -tests;  
 411  $^{\circ}p < 0.05$ , two-tailed one sample  $t$ -test.  
 412

## 413 Discussion

414

415 The ability to move and simultaneously plan future movements is a fundamental yet underappreciated  
416 faculty of the human brain. By manipulating the amount of visual information available for motor  
417 planning in a discrete sequence production task, we show that participants planned multiple actions  
418 (at least 3) into the future (Fig. 2-4). Sequence practice led to larger gains in speed for larger window  
419 sizes (MT difference, Fig. 3), as well as increases in the horizon of sequence planning (exponential fit,  
420 Fig. 3). In-depth analysis of the inter-press intervals (Fig. 5-6) revealed that enhanced planning of future  
421 actions was present both before (preplanning) and during (online planning) sequence production.

422

### 423 *Fast sequence production and the speed of online planning*

424 Before voluntary movements can be performed, they need to be planned (Keele, 1968; Keele and  
425 Summers, 1976; Kerr, 1978; Rosenbaum, 1980; Bock and Arnold, 1992; Crammond and Kalaska, 1994,  
426 2000; Cisek and Kalaska, 2002, 2004), at least to some degree (Cisek and Kalaska, 2010; Ames et al.,  
427 2014). However, many real-life motor skills require quick sequences of movements that are not always  
428 predictable. Proficiency in such skills depends on our ability to select and plan future movements both  
429 before and during sequence production. To investigate this ability, we used a viewing window paradigm  
430 that varied the amount of information available for planning the next movements. We replicate  
431 previous findings of anticipatory planning in the context of sequences (Rosenbaum et al., 1987; Rhodes  
432 et al., 2004; Herbort and Butz, 2009), and longer reaction times when more information for planning is  
433 available (Henry and Rogers, 1960). Critically, once such preplanning reaches capacity, the execution of  
434 later elements in the sequence slows down, which we interpret as evidence that successive movements  
435 need to be planned online. By varying the available time for preplanning, in a previous paper (Ariani  
436 and Diedrichsen, 2019) we showed that this was the case even for relatively short (e.g., 5-item) and  
437 well-known (e.g., trained) sequences – only the first 3 elements were fully planned prior to execution.  
438 Further evidence for online planning comes from a wide range of activities in which visual information  
439 is used for planning. For example, when participants make anticipatory eye movements to future  
440 targets in reading (Rayner, 1978), sequential reaching (Säfström et al., 2014), and object manipulation  
441 (Johansson et al., 2001). More directly, a recent unpublished study tackled the horizon of online  
442 planning by restricting the viewing window in a continuous manual tracking task (Bashford et al., 2018).  
443 Together, these studies support our view that the ability of the motor system to deal with a stream of  
444 incoming stimuli while producing motor responses (i.e., online planning) enables skillful performance  
445 of movement sequences.

446

447 ***Motor planning has a limited capacity***

448 We found that the span of the planning horizon (~3-4 movements) was smaller than the typical amount  
449 of information that can be stored in short-term memory (Miller, 1956; Cowan, 2010). However, more  
450 recent theories of short-term memory posit that capacity is not limited by a fixed number of items, but  
451 rather by finite attentional resources that can be flexibly allocated across multiple items (Luck and  
452 Vogel, 1997; Bays and Husain, 2008). Similarly, characterizing the planning horizon as having a hard,  
453 discrete limit (i.e., a specific number of movements) may not be the best description. A more realistic  
454 model would assert that cognitive resources are mainly allocated to the next upcoming movement,  
455 with a decaying distribution for elements further into the future (Fig. 7A). Such distribution is consistent  
456 with the Competitive Queueing hypothesis (Averbeck et al., 2002, 2006; Rhodes et al., 2004;  
457 Kornysheva et al., 2019; Mantziara et al., 2020). Eventually, subjects run out of resources and start  
458 executing responses. Completing preceding movements frees up new resources that can be allocated  
459 to plan successive movements online. In sum, the discrepancy between the short-term memory span  
460 and the planning horizon may reflect the fact that planning a movement takes up more central  
461 resources than remembering a digit.

462

463 ***The horizon of motor planning expands with practice***

464 If the capacity of motor planning depends on a soft, flexible horizon, we can ask whether this limit can  
465 be improved with practice. In agreement with a previous study (Bashford et al., 2018), we found that  
466 practice had expanded the span of the planning horizon. Our conclusion was based on two key  
467 observations: 1) the benefit of seeing further ahead was greater later in practice (significant interaction  
468 between  $w$  and day on MT); 2) the influence of window size on MT can be described with an exponential  
469 function whose decay rate decreased with practice (change in the slope of the exponential). Speed  
470 improvements that are independent of the amount of available information can be attributed to  
471 improved stimulus identification, S-R mapping, or implementation of single responses (Haith et al.,  
472 2016; Ariani and Diedrichsen, 2019; Hardwick et al., 2019). As participants become more fluent at  
473 translating numbers on the screen into finger movements, each individual press is executed more  
474 quickly, thus contributing to faster sequence production across all window sizes. However, the greater  
475 performance benefits for larger window sizes together with the expansion of the effective planning  
476 horizon indicate that participants improved their ability to make better use of advance information.  
477 Unlike previous studies that examined sequence-specific effects in sequence production (Verwey,  
478 2001; Verwey and Wright, 2004; Wiestler and Diedrichsen, 2013; Ariani and Diedrichsen, 2019; Berlot  
479 et al., 2020), here we focused on random sequences. Note that, because of this, the observed practice  
480 effects cannot be explained by the formation of specific chunking structures previously proposed as a

481 way to deal with the complexity of planning long movement sequences (Ramkumar et al., 2016; Popp  
482 et al., 2020). Instead, we found that even without prior experience with a specific sequence, people  
483 can improve in the motor planning processes that underlie sequence production. In other words,  
484 practice effects are not only about learning *what* sequence to produce, but also about learning *how* to  
485 coordinate execution and planning efficiently.

486

#### 487 *Implications for the neural control of sequential movements*

488 The present study provides behavioral evidence that online planning constitutes a central component  
489 of motor skill. It also raises the question of how planning and execution processes can simultaneously  
490 occur in the brain without interfering with each other. One possibility is that planning and execution  
491 take place in separate but communicating anatomical areas, such as the dorsal premotor cortex (PMd)  
492 for planning and the primary motor cortex (M1) for execution. However, several studies have reported  
493 signals related to movement planning also in brain structures responsible for movement (Crammond  
494 and Kalaska, 2000; Ames et al., 2014, 2019; Elsayed et al., 2016; Ariani et al., 2018), with signals often  
495 mixed even within single neurons (Evarts and Tanji, 1976; Riehle and Requin, 1989; Alexander and  
496 Crutcher, 1990; Prut and Fetz, 1999). Therefore, a more likely scenario is that planning and execution  
497 occur in overlapping neuronal populations, but occupy orthogonal subspaces of the multidimensional  
498 neuronal code (Fig. 7B), such that planning activity does not trigger motor output (Kaufman et al., 2014;  
499 Lara et al., 2018; Zimnik and Churchland, 2020).

500 Although most neurophysiological studies have focused on planning-related signals before  
501 movement onset (preplanning), how the neural substrates for planning change when the same  
502 neuronal population has to concurrently control an ongoing movement (online planning) remains an  
503 open question. Our behavioral results highlight notable similarities between preplanning and online  
504 planning: both processes led to faster performance when participants had a chance to plan up to 3  
505 upcoming sequence elements, with diminishing gains for larger window sizes. Additionally, practice-  
506 related improvements were comparable between early IPIs (mostly preplanning) and late IPIs (online  
507 planning). These similarities suggest that preplanning and online planning may rely on the same neural  
508 process (i.e., motor planning) happening in different contexts, either in isolation before movement  
509 initiation or in parallel with execution.

510 Finally, we showed that advanced planning does not stop at the next movement (+1) but  
511 continues for subsequent movements as well (+2 and beyond). How are these parallel planning  
512 processes organized at the neural level? Again, one possibility is that they are implemented in separate  
513 neural populations in different brain areas, or at least orthogonal subspaces (Fig. 7B). Alternatively,  
514 multiple future movements could be planned as an integrated packet (i.e., as a movement chunk), such

515 that there is only one, shared, planning subspace, with specialized code for specific transitions (i.e., 2-  
 516 3) in movement sequences (Fig. 7C). Evidence for such an integrated code has been reported in studies  
 517 of the SMA (Tanji and Shima, 1994; Hoshi and Tanji, 2004), which found neurons sensitive to specific  
 518 sequences of actions.

519 In conclusion, our study provides a behavioral foundation for the investigation of the neural  
 520 control of sequential movements, both by establishing online planning as an important element in  
 521 skilled motor performance and by developing a behavioral paradigm that allows the detailed study of  
 522 its neural underpinnings.

523  
 524

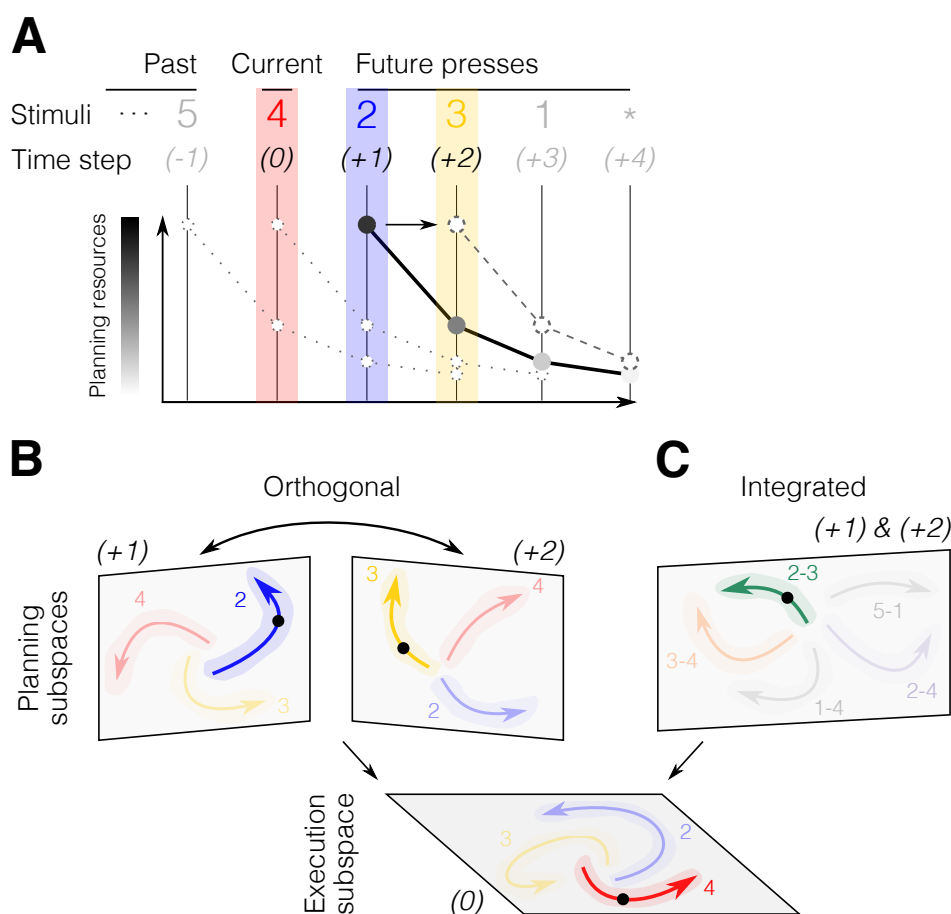

525

526 **Figure 7 | Planning capacity and implications for neural models of sequential**  
 527 **behavior.** **A.** The “soft” horizon of sequence planning depends on the amount  
 528 of resources available. In this illustrative example, most resources are invested  
 529 in the planning of the immediately upcoming press (+1, 2, blue). The further in  
 530 time a press is from the current press (0, 4, red), the smaller the corresponding  
 531 planning investment. Once a press has been initiated, the resources are  
 532 redistributed by shifting the planning curve one step ahead, thus allowing for  
 533 continuous online planning of future presses (e.g., +2, 3, yellow). **B.**  
 534 Hypothetical neuronal population activity in a brain region involved in both  
 535 planning and execution processes. Each plane refers to an independent  
 536 subspace of the multidimensional population activity with possible neural  
 537 trajectories for the current action (0), and future actions (+1, +2), color-coded

538 *as in A. Shaded areas reflect single trial variability. The current neural state is*  
539 *indicated by a black dot. Here, planning of the next (+1) and future actions (+2)*  
540 *evolve in orthogonal subspaces. C. Alternatively, planning of future movement*  
541 *transitions may occur in an integrated manner.*

## 542 References

- 543 Alexander GE, Crutcher MD (1990) Neural representations of the target (goal) of visually guided arm  
544 movements in three motor areas of the monkey. *Journal of Neurophysiology* 64:164–178.
- 545 Ames KC, Ryu SI, Shenoy K V. (2014) Neural dynamics of reaching following incorrect or absent motor  
546 preparation. *Neuron* 81:438–451.
- 547 Ames KC, Ryu SI, Shenoy K V. (2019) Simultaneous motor preparation and execution in a last-moment  
548 reach correction task. *Nature Communications* 10:2718.
- 549 Ariani G, Diedrichsen J (2019) Sequence learning is driven by improvements in motor planning.  
550 *Journal of Neurophysiology* 121:2088–2100.
- 551 Ariani G, Kwon YH, Diedrichsen J (2020) Repetita iuvant: repetition facilitates online planning of  
552 sequential movements. *Journal of Neurophysiology* 123:1727–1738.
- 553 Ariani G, Oosterhof NN, Lingnau A (2018) Time-resolved decoding of planned delayed and immediate  
554 prehension movements. *Cortex* 99.
- 555 Averbeck BB, Chafee M V., Crowe DA, Georgopoulos AP (2002) Parallel processing of serial  
556 movements in prefrontal cortex. *Proceedings of the National Academy of Sciences* 99:13172–  
557 13177.
- 558 Averbeck BB, Sohn JW, Lee D (2006) Activity in prefrontal cortex during dynamic selection of action  
559 sequences. *Nature Neuroscience* 9:276–282.
- 560 Bashford L, Kobak DD, Diedrichsen J, Mehring C (2018) Motor skill learning leads to the increase of  
561 planning horizon. *bioRxiv* c:505198.
- 562 Bays PM, Husain M (2008) Dynamic Shifts of Limited Working Memory Resources in Human Vision.  
563 *Science* 321:851–854.
- 564 Berlot E, Popp NJ, Diedrichsen J (2020) A critical re-evaluation of fMRI signatures of motor sequence  
565 learning. *eLife* 9:2020.01.08.899229.
- 566 Bock O, Arnold K (1992) Motor control prior to movement onset: preparatory mechanisms for  
567 pointing at visual targets. *Experimental Brain Research* 90:209–216.
- 568 Churchland MM, Cunningham JP, Kaufman MT, Ryu SI, Shenoy K V. (2010) Cortical Preparatory  
569 Activity: Representation of Movement or First Cog in a Dynamical Machine? *Neuron* 68:387–  
570 400.
- 571 Cisek P, Kalaska JF (2002) Simultaneous Encoding of Multiple Potential Reach Directions in Dorsal  
572 Premotor Cortex. *Journal of Neurophysiology* 87:1149–1154.
- 573 Cisek P, Kalaska JF (2004) Neural correlates of mental rehearsal in dorsal premotor cortex. *Nature*  
574 431:993–996.
- 575 Cisek P, Kalaska JF (2010) Neural mechanisms for interacting with a world full of action choices.

- 576 Annual review of neuroscience 33:269–298.
- 577 Cohen A, Ivry RB, Keele SW (1990) Attention and structure in sequence learning.
- 578 JExpPsychol[LearnMemCogn] 16:17–30.
- 579 Cowan N (2010) The Magical Mystery Four. *Current Directions in Psychological Science* 19:51–57.
- 580 Crammond DJ, Kalaska JF (1994) Modulation of preparatory neuronal activity in dorsal premotor
- 581 cortex due to stimulus-response compatibility. *Journal of Neurophysiology* 71:1281–1284.
- 582 Crammond DJ, Kalaska JF (2000) Prior information in motor and premotor cortex: activity during the
- 583 delay period and effect on pre-movement activity. *Journal of neurophysiology* 84:986–1005.
- 584 Diedrichsen J, Kornysheva K (2015) Motor skill learning between selection and execution. *Trends in*
- 585 *Cognitive Sciences* 19:227–233.
- 586 Elsayed GF, Lara AH, Kaufman MT, Churchland MM, Cunningham JP (2016) Reorganization between
- 587 preparatory and movement population responses in motor cortex. *Nature*
- 588 *Communications*:13239.
- 589 Ericsson KA, Krampe RT, Tesch-Römer C (1993) The role of deliberate practice in the acquisition of
- 590 expert performance. *Psychological Review* 100:363–406.
- 591 Evarts E V, Tanji J (1976) Reflex and intended responses in motor cortex pyramidal tract neurons of
- 592 monkey. *Journal of neurophysiology* 39:1069–1080.
- 593 Haith AM, Pakpoor J, Krakauer JW (2016) Independence of Movement Preparation and Movement
- 594 Initiation. *Journal of Neuroscience* 36:3007–3015.
- 595 Hardwick RM, Forrence AD, Krakauer JW, Haith AM (2019) Time-dependent competition between
- 596 goal-directed and habitual response preparation. *Nature Human Behaviour* 3:1252–1262.
- 597 Henry FM, Rogers DE (1960) Increased Response Latency for Complicated Movements and A
- 598 “Memory Drum” Theory of Neuromotor Reaction. *Research Quarterly American Association for*
- 599 *Health, Physical Education and Recreation* 31:448–458.
- 600 Herbort O, Butz M V. (2009) Anticipatory planning of sequential hand and finger movements. *Journal*
- 601 *of Motor Behavior* 41:561–569.
- 602 Hoshi E, Tanji J (2004) Differential roles of neuronal activity in the supplementary and
- 603 presupplementary motor areas: from information retrieval to motor planning and execution.
- 604 *Journal of neurophysiology* 92:3482–3499.
- 605 Johansson RS, Westling G, Bäckström A, Flanagan JR (2001) Eye–Hand Coordination in Object
- 606 Manipulation. *The Journal of Neuroscience* 21:6917–6932.
- 607 Kaufman MT, Churchland MM, Ryu SI, Shenoy K V (2014) Cortical activity in the null space: permitting
- 608 preparation without movement. *Nature Neuroscience* 17:440–448.
- 609 Keele SW (1968) Movement control in skilled motor performance. *Psychological Bulletin* 70:387–403.



- 610 Keele SW, Summers JJ (1976) The Structure of Motor Programs. In: Motor Control, pp 109–142.  
611 Elsevier.
- 612 Kerr B (1978) Task Factors That Influence Selection and Preparation for Voluntary Movements. In:  
613 Information Processing in Motor Control and Learning, pp 55–69. Elsevier.
- 614 Kornysheva K, Bush D, Meyer SS, Sadnicka A, Barnes G, Burgess N (2019) Neural Competitive Queuing  
615 of Ordinal Structure Underlies Skilled Sequential Action. *Neuron* 101:1166–1180.e3.
- 616 Kornysheva K, Sierk A, Diedrichsen J (2013) Interaction of temporal and ordinal representations in  
617 movement sequences. *Journal of Neurophysiology* 109:1416–1424.
- 618 Krakauer JW, Hadjiosif AM, Xu J, Wong AL, Haith AM (2019) Motor learning. *Comprehensive*  
619 *Physiology* 9:613–663.
- 620 Lara AH, Elsayed GF, Zimnik AJ, Cunningham JP, Churchland MM (2018) Conservation of preparatory  
621 neural events in monkey motor cortex regardless of how movement is initiated. *eLife* 7.
- 622 Lashley K (1951) The problem of serial order in behavior. *Cerebral Mechanisms in Behavior* Edited  
623 by:112–147.
- 624 Luck SJ, Vogel EK (1997) The capacity of visual working memory for features and conjunctions. *Nature*  
625 390:279–284.
- 626 Mantziara M, Ivanov T, Houghton G, Kornysheva K (2020) Competitive state of actions during planning  
627 predicts sequence execution accuracy. *bioRxiv:2020.05.08.085068*.
- 628 Matthis JS, Fajen BR (2014) Visual control of foot placement when walking over complex terrain.  
629 *Journal of Experimental Psychology: Human Perception and Performance* 40:106–115.
- 630 Miller GA (1956) The magical number seven, plus or minus two: some limits on our capacity for  
631 processing information. *Psychological Review* 63:81–97.
- 632 Popp NJ, Yokoi A, Gribble PL, Diedrichsen J (2020) The effects of habits on motor skill learning.  
633 *bioRxiv:338749*.
- 634 Prut Y, Fetz EE (1999) Primate spinal interneurons show pre-movement instructed delay activity.  
635 *Nature* 401:590–594.
- 636 Ramkumar P, Acuna DE, Berniker M, Grafton ST, Turner RS, Kording KP (2016) Chunking as the result  
637 of an efficiency computation trade-off. *Nature Communications* 7:1–11.
- 638 Rayner K (1978) Eye movements in reading and information processing. *Psychological Bulletin*  
639 85:618–660.
- 640 Rayner K (1998) Eye movements in reading and information processing: 20 years of research.  
641 *Psychological Bulletin* 124:372–422.
- 642 Rayner K (2014) The gaze-contingent moving window in reading: Development and review. *Visual*  
643 *Cognition* 22:242–258.

- 644 Rayner K, Reingold EM (2015) Evidence for direct cognitive control of fixation durations during  
645 reading. *Current Opinion in Behavioral Sciences* 1:107–112.
- 646 Rhodes BJ, Bullock D, Verwey WB, Averbach BB, Page MPA (2004) Learning and production of  
647 movement sequences: Behavioral, neurophysiological, and modeling perspectives. *Human*  
648 *Movement Science* 23:699–746.
- 649 Riehle A, Requin J (1989) Monkey primary motor and premotor cortex: single-cell activity related to  
650 prior information about direction and extent of an intended movement. *Journal of*  
651 *Neurophysiology* 61:534–549.
- 652 Rosenbaum DA (1980) Human movement initiation: Specification of arm, direction, and extent.  
653 *Journal of Experimental Psychology: General* 109:444–474.
- 654 Rosenbaum DA, Cohen RG, Jax SA, Weiss DJ, van der Wel R (2007) The problem of serial order in  
655 behavior: Lashley’s legacy. *Human Movement Science* 26:525–554.
- 656 Rosenbaum DA, Hindorff V, Munro EM (1987) Scheduling and Programming of Rapid Finger  
657 Sequences: Tests and Elaborations of the Hierarchical Editor Model. *Journal of Experimental*  
658 *Psychology: Human Perception and Performance* 13:193–203.
- 659 Säfström D, Flanagan JR, Johansson RS (2013) Skill learning involves optimizing the linking of action  
660 phases. *Journal of Neurophysiology* 110:1291–1300.
- 661 Säfström D, Johansson RS, Flanagan JR (2014) Gaze behavior when learning to link sequential action  
662 phases in a manual task. *Journal of Vision* 14:1–15.
- 663 Tanji J, Shima K (1994) Role for supplementary motor area cells in planning several movements  
664 ahead. *Nature* 371:413–416.
- 665 Verwey WB (1994) Mechanisms of skill in sequential motor behavior.
- 666 Verwey WB (2001) Concatenating familiar movement sequences: The versatile cognitive processor.  
667 *Acta Psychologica* 106:69–95.
- 668 Verwey WB, Abrahamse EL (2012) Distinct modes of executing movement sequences: Reacting,  
669 associating, and chunking. *Acta Psychologica* 140:274–282.
- 670 Verwey WB, Shea CH, Wright DL (2014) A cognitive framework for explaining serial processing and  
671 sequence execution strategies. *Psychonomic Bulletin and Review* 22:54–77.
- 672 Verwey WB, Wright DL (2004) Effector-independent and effector-dependent learning in the discrete  
673 sequence production task. *Psychological Research*.
- 674 Waters-Metenier S, Husain M, Wiestler T, Diedrichsen J (2014) Bihemispheric Transcranial Direct  
675 Current Stimulation Enhances Effector-Independent Representations of Motor Synergy and  
676 Sequence Learning. *The Journal of Neuroscience* 34:1037–1050.
- 677 Wiestler T, Diedrichsen J (2013) Skill learning strengthens cortical representations of motor

678 sequences. *eLife* 2:e00801.

679 Wiestler T, Waters-Metenier S, Diedrichsen J (2014) Effector-independent motor sequence  
680 representations exist in extrinsic and intrinsic reference frames. *Journal of Neuroscience*  
681 34:5054–5064.

682 Willingham DB (1999) Implicit motor sequence learning is not purely perceptual. *Memory and*  
683 *Cognition* 27:561–572.

684 Wong AL, Haith AM, Krakauer JW (2015a) Motor Planning. *The Neuroscientist* 21:385–398.

685 Wong AL, Lindquist MA, Haith AM, Krakauer JW (2015b) Explicit knowledge enhances motor vigor and  
686 performance: motivation versus practice in sequence tasks. *Journal of Neurophysiology*  
687 114:219–232.

688 Yarrow K, Brown P, Krakauer JW (2009) Inside the brain of an elite athlete: the neural processes that  
689 support high achievement in sports. *Nature reviews Neuroscience* 10:585–596.

690 Zimnik AJ, Churchland MM (2020) Generation of Rapid Sequences by Motor Cortex.  
691 bioRxiv:2020.06.09.143040.

692
